# Supplementary material for: Characterization of Induced Pluripotent Stem Cell-derived Human Serotonergic Neurons
Source: PubMed Central journal article supplement (PMC5420558; doi:10.3389/fncel.2017.00131), 2017-05-08
Supplement: Table_1.pdf [file Table_1.pdf]

## *Supplementary Material*

### **Characterization of Induced Pluripotent Stem Cell-derived Human Serotonergic Neurons**

Lining Cao<sup>1</sup>, Rui Hu<sup>1</sup>, Ting Xu<sup>1</sup>, Zhen-Ning Zhang<sup>1</sup>, Weida Li<sup>1</sup>, Jianfeng Lu<sup>1,2\*</sup>

\* **Correspondence:** Dr. Jianfeng Lu: LU.JIANFENG@Tongji.edu.cn

**Supplementary Table S1: List of antibodies used in this study.**

| <b>Name</b>  | <b>Company</b>    | <b>Host</b> | <b>Dilution</b> |
|--------------|-------------------|-------------|-----------------|
| Serotonin    | Abcam             | Mouse       | 1:100           |
| AADC         | Chemicon          | Rabbit      | 1:500           |
| GATA2        | Sigma             | Rabbit      | 1:500           |
| GATA3        | R&D               | Mouse       | 1:1000          |
| GFAP         | Dako              | Rabbit      | 1:5000          |
| HTR1a        | Millipore         | Mouse       | 1:400           |
| HUMAN NUCLEI | Millipore         | Mouse       | 1:200           |
| Ki67         | ZYMED             | Rabbit      | 1:200           |
| MBP          | Fisher Scientific | Rabbit      | 1:500           |
| MHC1         | Epitomics         | Rabbit      | 1:200           |
| NeuN         | Millipore         | Rabbit      | 1:2000          |
| SERT         | ImmunoStar        | Rabbit      | 1:5000          |
| STEM121      | Stem cells        | Mouse       | 1:500           |
| TH           | Pel-Freez         | Rabbit      | 1:1000          |
| TPH2         | Novus Biologicals | Rabbit      | 1:2000          |
| Tuj1         | Covance           | Rabbit      | 1:10000         |
| VMAT2        | Abcam             | Mouse       | 1:50            |
